# Supplementary material
Source: MDPI journal article supplement (https://www.mdpi.com/1424-2818/15/7/811)
Supplement: s1 [file s1]

**Supplementary table S3.** Reconstructed haplotypes for the *TLR1*, -2, -4, -5 and -6 genes.

Haplotypes were reconstructed for the Czech Red Pied cattle population based on individual genotyping. Haplotype frequencies in the Czech Red Pied population are indicated. The haplotypes are numbered in alphabetical order.

| Haplotype number | Order of SNPs <sup>a</sup> | Frequency (%) | Matching haplotypes in earlier works |                                 |
|------------------|----------------------------|---------------|--------------------------------------|---------------------------------|
|                  |                            |               | White et al., 2003 <sup>b</sup>      | Novák et al., 2017 <sup>c</sup> |
| TLR1             |                            |               |                                      |                                 |
| 1                | C_A_C                      | 10.70         |                                      |                                 |
| 2                | C_A_T                      | 20.03         |                                      |                                 |
| 3                | C_G_C                      | 1.01          |                                      |                                 |
| 4                | C_G_T                      | 16.88         |                                      |                                 |
| 5                | T_A_C                      | 10.46         |                                      |                                 |
| 6                | T_A_T                      | 21.51         |                                      |                                 |
| 7                | T_G_C                      | 0.74          |                                      |                                 |
| 8                | T_G_T                      | 18.64         |                                      |                                 |
| TLR2             |                            |               |                                      |                                 |
| 1                | C_A_C_G_A_A_G_C_T_G        | 0.40          |                                      |                                 |
| 2                | C_A_C_G_A_A_G_T_T_G        | 0.87          |                                      |                                 |
| 3                | C_A_C_T_A_G_A_C_C_A        | 0.53          |                                      |                                 |
| 4                | C_A_C_T_A_G_G_T_C_A        | 0.22          |                                      |                                 |
| 5                | C_A_C_T_A_G_G_T_C_G        | 0.82          |                                      |                                 |
| 6                | C_A_C_T_A_G_G_T_T_G        | 1.94          |                                      |                                 |
| 7                | C_A_T_G_A_G_G_T_T_G        | 0.57          |                                      |                                 |
| 8                | C_G_T_G_A_G_G_C_T_G        | 0.22          |                                      |                                 |
| 9                | C_G_T_G_A_G_G_T_T_G        | 0.40          |                                      |                                 |
| 10               | C_G_T_G_G_G_G_T_T_A        | 0.47          |                                      |                                 |
| 11               | C_G_T_G_G_G_G_T_T_G        | 2.14          |                                      |                                 |
| 12               | C_G_T_T_G_G_G_T_T_A        | 0.43          |                                      |                                 |
| 13               | T_A_C_G_A_A_G_T_T_G        | 0.36          |                                      |                                 |
| 14               | T_A_C_T_A_G_A_C_C_A        | 0.32          |                                      |                                 |
| 15               | T_A_C_T_A_G_G_T_T_G        | 0.30          |                                      |                                 |
| 16               | T_A_T_G_A_G_G_T_T_G        | 0.35          |                                      |                                 |
| 17               | T_G_T_G_A_A_G_T_T_G        | 0.80          |                                      |                                 |
| 18               | T_G_T_G_A_G_G_T_T_G        | 0.36          |                                      |                                 |
| 19               | T_G_T_G_G_A_G_T_T_G        | 1.86          |                                      |                                 |
| 20               | T_G_T_G_G_G_A_C_C_A        | 0.71          |                                      |                                 |
| 21               | T_G_T_G_G_G_A_C_C_G        | 2.60          |                                      |                                 |
| 22               | T_G_T_G_G_G_G_C_T_A        | 0.96          |                                      |                                 |
| 23               | T_G_T_G_G_G_G_C_T_G        | 4.86          |                                      |                                 |
| 24               | T_G_T_G_G_G_G_T_C_G        | 0.96          |                                      |                                 |
| 25               | T_G_T_G_G_G_G_T_T_A        | 9.95          |                                      |                                 |
| 26               | T_G_T_G_G_G_G_T_T_G        | 51.61         |                                      |                                 |
| 27               | T_G_T_T_A_G_G_T_T_A        | 0.23          |                                      |                                 |
| 28               | T_G_T_T_A_G_G_T_T_G        | 0.39          |                                      |                                 |

|                        |                     |       |        |      |
|------------------------|---------------------|-------|--------|------|
| 29                     | T_G_T_T_G_A_G_T_T_G | 2.02  |        |      |
| 30                     | T_G_T_T_G_G_A_C_C_G | 1.93  |        |      |
| 31                     | T_G_T_T_G_G_G_C_T_A | 0.38  |        |      |
| 32                     | T_G_T_T_G_G_G_C_T_G | 3.79  |        |      |
| 33                     | T_G_T_T_G_G_G_T_T_A | 1.14  |        |      |
| 34                     | T_G_T_T_G_G_G_T_T_G | 4.93  |        |      |
| TLR2 – proximal 6 SNPs |                     |       |        |      |
| 1                      | C_A_C_G_A_A         | 0.70  |        |      |
| 2                      | C_A_C_G_A_G         | 9.83  |        |      |
| 3                      | C_A_T_G_A_A         | 0.71  |        |      |
| 4                      | C_A_T_T_A_G         | 1.05  |        |      |
| 5                      | C_G_T_T_G_G         | 0.98  |        |      |
| 6                      | T_A_C_G_A_G         | 1.28  |        |      |
| 7                      | T_G_T_G_A_A         | 2.19  |        |      |
| 8                      | T_G_T_G_G_A         | 11.07 |        |      |
| 9                      | T_G_T_G_G_G         | 9.79  |        |      |
| 10                     | T_G_T_T_A_G         | 1.65  |        |      |
| 11                     | T_G_T_T_G_A         | 6.76  |        |      |
| 12                     | T_G_T_T_G_G         | 51.50 |        |      |
| TLR4                   |                     |       |        |      |
| 1                      | C_C_A_A_G_T_T       | 1.72  |        |      |
| 2                      | C_C_A_G_A_T_T       | 0.71  |        |      |
| 3                      | C_C_A_G_G_C_G       | 0.90  |        |      |
| 4                      | C_C_A_G_G_C_T       | 3.71  |        | 4    |
| 5                      | C_C_A_G_G_T_G       | 2.28  |        |      |
| 6                      | C_C_A_G_G_T_T       | 13.89 |        |      |
| 7                      | C_C_G_A_A_C_T       | 0.64  |        |      |
| 8                      | C_C_G_A_A_T_G       | 1.56  |        |      |
| 9                      | C_C_G_A_A_T_T       | 2.30  | A5     | 8    |
| 10                     | C_C_G_G_A_C_G       | 0.95  |        | 5    |
| 11                     | C_C_G_G_A_C_T       | 5.17  |        | 6, 7 |
| 12                     | C_C_G_G_A_T_G       | 2.57  |        |      |
| 13                     | C_C_G_G_A_T_T       | 12.05 |        |      |
| 14                     | C_C_G_G_G_T_T       | 0.72  |        |      |
| 15                     | C_T_G_G_A_C_T       | 1.27  | A1, B1 |      |
| 16                     | C_T_G_G_A_T_T       | 1.52  |        | 10   |
| 17                     | C_T_G_G_G_T_T       | 1.36  |        |      |
| 18                     | G_C_A_A_G_C_T       | 0.94  | A2     | 14   |
| 19                     | G_C_A_A_G_T_T       | 0.55  |        |      |
| 20                     | G_C_A_G_A_C_T       | 2.52  |        | 11   |
| 21                     | G_C_A_G_A_T_G       | 0.83  |        |      |
| 22                     | G_C_A_G_A_T_T       | 3.30  |        | 12   |
| 23                     | G_C_A_G_G_C_G       | 0.96  |        |      |
| 24                     | G_C_A_G_G_C_T       | 7.96  |        |      |
| 25                     | G_C_A_G_G_T_G       | 2.48  |        |      |
| 26                     | G_C_A_G_G_T_T       | 14.83 |        |      |
| 27                     | G_C_G_A_A_T_T       | 0.64  |        | 15   |
| 28                     | G_C_G_G_A_C_T       | 1.11  | B1     | 7    |

|      |                   |       |  |  |
|------|-------------------|-------|--|--|
| 29   | G_C_G_G_A_T_T     | 3.19  |  |  |
| TLR5 |                   |       |  |  |
| 1    | A_C_C_G_C_T_C_C_A | 1.15  |  |  |
| 2    | A_C_C_G_T_T_C_C_A | 1.93  |  |  |
| 3    | A_C_C_G_T_T_C_C_G | 1.59  |  |  |
| 4    | A_C_C_T_C_T_C_C_A | 6.76  |  |  |
| 5    | A_C_C_T_C_T_C_C_G | 0.52  |  |  |
| 6    | A_C_C_T_C_T_T_C_A | 1.44  |  |  |
| 7    | A_C_C_T_T_C_C_C_A | 0.3   |  |  |
| 8    | A_C_C_T_T_C_C_C_G | 0.32  |  |  |
| 9    | A_C_C_T_T_T_C_C_A | 2.63  |  |  |
| 10   | A_C_C_T_T_T_C_C_G | 0.4   |  |  |
| 11   | A_C_T_G_T_C_C_T_A | 0.79  |  |  |
| 12   | A_C_T_T_C_C_C_C_A | 3.23  |  |  |
| 13   | A_C_T_T_C_C_C_C_G | 0.28  |  |  |
| 14   | A_C_T_T_C_C_C_T_A | 4.19  |  |  |
| 15   | A_C_T_T_C_C_C_T_G | 0.39  |  |  |
| 16   | A_C_T_T_C_C_T_C_A | 1.14  |  |  |
| 17   | A_C_T_T_C_C_T_T_A | 2.87  |  |  |
| 18   | A_C_T_T_C_T_C_C_A | 0.46  |  |  |
| 19   | A_C_T_T_C_T_T_C_A | 0.48  |  |  |
| 20   | A_C_T_T_T_C_C_C_A | 0.83  |  |  |
| 21   | A_C_T_T_T_C_C_C_G | 0.96  |  |  |
| 22   | A_C_T_T_T_T_C_C_A | 0.5   |  |  |
| 23   | A_C_T_T_T_T_C_T_A | 0.33  |  |  |
| 24   | A_C_T_T_T_T_T_C_A | 0.91  |  |  |
| 25   | A_C_T_T_T_T_T_T_A | 0.23  |  |  |
| 26   | A_G_C_G_C_T_C_C_A | 0.96  |  |  |
| 27   | A_G_C_G_T_T_C_C_A | 2.18  |  |  |
| 28   | A_G_C_G_T_T_C_C_G | 0.44  |  |  |
| 29   | A_G_C_T_C_C_C_C_A | 0.34  |  |  |
| 30   | A_G_C_T_C_C_C_T_A | 0.31  |  |  |
| 31   | A_G_C_T_C_T_C_C_A | 14.85 |  |  |
| 32   | A_G_C_T_C_T_C_C_G | 0.85  |  |  |
| 33   | A_G_C_T_C_T_C_T_A | 0.54  |  |  |
| 34   | A_G_C_T_T_C_C_C_A | 0.44  |  |  |
| 35   | A_G_C_T_T_T_C_C_A | 2.2   |  |  |
| 36   | A_G_C_T_T_T_C_C_G | 0.35  |  |  |
| 37   | A_G_T_G_T_C_C_C_A | 1.23  |  |  |
| 38   | A_G_T_G_T_C_C_T_A | 0.86  |  |  |
| 39   | A_G_T_T_C_C_C_C_A | 7.64  |  |  |
| 40   | A_G_T_T_C_C_C_C_G | 1.25  |  |  |
| 41   | A_G_T_T_C_C_C_T_A | 14.24 |  |  |
| 42   | A_G_T_T_C_C_C_T_G | 1.45  |  |  |
| 43   | A_G_T_T_C_C_T_C_A | 0.61  |  |  |
| 44   | A_G_T_T_C_C_T_T_A | 0.8   |  |  |
| 45   | A_G_T_T_C_T_C_C_A | 3.91  |  |  |
| 46   | A_G_T_T_C_T_C_C_G | 0.27  |  |  |

|             |                   |       |  |  |
|-------------|-------------------|-------|--|--|
| 47          | A_G_T_T_T_C_C_C_A | 3.31  |  |  |
| 48          | A_G_T_T_T_C_C_C_G | 2.53  |  |  |
| 49          | A_G_T_T_T_C_C_T_A | 0.38  |  |  |
| 50          | A_G_T_T_T_C_C_T_G | 0.31  |  |  |
| 51          | A_G_T_T_T_T_C_C_A | 0.81  |  |  |
| 52          | G_G_C_G_T_T_C_C_A | 0.29  |  |  |
| 53          | G_G_T_G_T_C_C_T_A | 0.32  |  |  |
| 54          | G_G_T_T_C_C_C_T_A | 1.24  |  |  |
| 55          | G_G_T_T_T_C_C_C_G | 0.18  |  |  |
| <i>TLR6</i> |                   |       |  |  |
| 1           | A_C_A_C           | 5.53  |  |  |
| 2           | A_C_A_T           | 2.44  |  |  |
| 3           | A_C_G_C           | 3.07  |  |  |
| 4           | A_C_G_T           | 1.28  |  |  |
| 5           | A_G_A_C           | 2.90  |  |  |
| 6           | A_G_A_T           | 0.90  |  |  |
| 7           | A_G_G_C           | 3.27  |  |  |
| 8           | A_G_G_T           | 1.00  |  |  |
| 9           | G_C_A_C           | 36.45 |  |  |
| 10          | G_C_A_T           | 18.63 |  |  |
| 11          | G_C_G_C           | 7.83  |  |  |
| 12          | G_C_G_T           | 4.10  |  |  |
| 13          | G_G_A_C           | 4.28  |  |  |
| 14          | G_G_A_T           | 2.65  |  |  |
| 15          | G_G_G_C           | 3.20  |  |  |
| 16          | G_G_G_T           | 2.38  |  |  |

<sup>a</sup> The order of SNPs is:

798C>T, 1762G>A, and 2097T>C in *TLR1* according to the reference sequence FJ147090, 115T>C, 1009A>G, 1044T>C, 1047T>G, 1060G>A, 1313G>A, 2546G>A, 2565T>C, 2883T>C, and 3206G>A in *TLR2* according to the reference sequence EU746465, 245G>C, 610C>T, 5087A>G, 5134G>A, 7999A>G, 9422C>T, and 10310T>G in *TLR4* according to the reference sequence AC000135.1, 305A>G, 488C>G, 545C>T, 619T>G, 1736C>T, 3714T>C, 3891C>T, 4626C>T and 5144A>G in *TLR5* according to the reference sequence EU006635, 855G>A, 865G>C, 990G>A, and 1337T>C in *TLR6* according to the reference sequence AJ618974.

The individual SNPs are separated by underscores.

<sup>b</sup> Haplotypes compared by overlapping SNPs 5087, 9422 and 10310 in *TLR4*.

<sup>c</sup> Haplotypes compared by overlapping SNPs 245, 610, 5087, 7999, 9422 and 10310 in *TLR4*.
