# Supplementary material
Source: MDPI journal article supplement (https://www.mdpi.com/1424-2818/15/7/811)
Supplement: s1 [file s1]

**Supplementary table S1.** Reference sequences and amplification primers for bovine *TLRs*. The set of amplicons was used for resequencing with PacBio RS II technology - adapted according to [22].

| Gene        | Reference sequence | Fragment denotation | Amplicon start | Amplicon end | Product length (base pairs) | Forward primer denotation | Forward primer sequence 5'→3'        | Reverse primer denotation | Reverse primer sequence 5'→3' | Annealing temperature in PCR (°C) |
|-------------|--------------------|---------------------|----------------|--------------|-----------------------------|---------------------------|--------------------------------------|---------------------------|-------------------------------|-----------------------------------|
| <i>TLR1</i> | FJ147090           | T1_1                | 196            | 1361         | 1166                        | 1_1F                      | ATGCCTGACATC<br>CTCTCACT             | 1_1R                      | AGAACCTTGATCT<br>GAGGAGGT     | 62/60                             |
| <i>TLR1</i> | FJ147090           | T1_2                | 992            | 2186         | 1195                        | 1_2F                      | TGACCCAGGAA<br>ATGAAGTCT             | 1_2R                      | CCGTGTTAATGTA<br>TTTCTGCTG    | 62/60                             |
| <i>TLR2</i> | EU746465           | T2_1                | 1              | 816          | 816                         | 2_1F                      | TCCTGCTCCATA<br>TTCCTACG             | 2_1R                      | TGACTGTGTTTGA<br>CATCATGG     | 62/60                             |
| <i>TLR2</i> | EU746465           | T2_2                | 556            | 1223         | 668                         | 2_2F                      | CTCATTCATTTAT<br>GGCTGGC             | 2_2R                      | GACCTGAACCAG<br>GAGGATG       | 62/60                             |
| <i>TLR2</i> | EU746465           | T2_3                | 911            | 1726         | 816                         | 2_3F                      | CGGAAGGAGCCT<br>CTGACCAGGCT          | 2_3R                      | CATGGGTACAGT<br>CATCAAATC     | 62/60                             |
| <i>TLR2</i> | EU746465           | T2_4                | 1581           | 2354         | 774                         | 2_4F                      | AGCATCCATCAG<br>TGAAATGAG            | 2_4R                      | GGTAAGAAGGAG<br>GCATCTGG      | 60/58                             |
| <i>TLR2</i> | EU746465           | T2_5                | 2206           | 2935         | 730                         | 2_5F                      | AGTTTAACCCAG<br>TGCCTTCC             | 2_5R                      | TGGAGTCAATGA<br>TGTTGTCTG     | 62/60                             |
| <i>TLR2</i> | EU746465           | T2_6                | 2813           | 3248         | 436                         | 2_6F                      | CCTACTGGGTGG<br>AGAACCTC             | 2_6R                      | ACCACCAGACCA<br>AGACTGAC      | 62/60                             |
| <i>TLR4</i> | AC000135.1         | T4_1                | -3             | 657          | 661                         | 4_1F                      | CCAGGGTATTTT<br>GTTATGGCTGGA<br>ACAT | 4_1R                      | TGTTTGCAAATGA<br>ACCTAACCA    | 62/60                             |
| <i>TLR4</i> | AC000135.1         | T4_2                | 4999           | 5382         | 384                         | 4_2F                      | TCTTTGCTCGTCC<br>CAGTAGC             | 4_2R                      | AAGTGAATGAAA<br>AGGAGACCTCA   | 62/60                             |
| <i>TLR4</i> | AC000135.1         | T4_3                | 7941           | 9154         | 1214                        | 4_3F                      | GGAGACCTAGAT<br>GACTGGGTTG           | 4_3R                      | AAGACAATGCGG<br>ATGTTGGT      | 62/60                             |
| <i>TLR4</i> | AC000135.1         | T4_4                | 8924           | 9596         | 673                         | 4_4F                      | TTTCAAGGGGTG<br>CTGTTCTC             | 4_4R                      | TGCACACATCATT<br>TGCTCAG      | 64/62                             |
| <i>TLR4</i> | AC000135.1         | T4_5                | 9299           | 10110        | 812                         | 4_5F                      | AGCCCAGACAG<br>CATTCAC               | 4_5R                      | CTATAGGGCTCG<br>CGTACCAC      | 62/60                             |
| <i>TLR4</i> | AC000135.1         | T4_6                | 9684           | 10420        | 737                         | 4_6F                      | GTCAGTGTGCTC<br>CTGGTGTC             | 4_6R                      | GCCGCAGGAGAG<br>ACTTCT        | 64/62                             |
| <i>TLR5</i> | EU006635           | T5_1                | -3             | 638          | 642                         | 5_1F                      | TTTGGGAAACGG<br>AGGATAAG             | 5_1R                      | GCACCTTTGAGG<br>CTGTGA        | 62/60                             |
| <i>TLR5</i> | EU006635           | T5_2                | 553            | 1241         | 689                         | 5_2F                      | GCCTGCTTTTGAT<br>ACTTTGG             | 5_2R                      | AGGTGTCCGCTAT<br>GTTCTCA      | 62/60                             |
| <i>TLR5</i> | EU006635           | T5_3                | 1065           | 1627         | 563                         | 5_3F                      | TCCCTTACCTTCC<br>AGCAGA              | 5_3R                      | AAGTTGGGGAAA<br>ACATTAGG      | 60/58                             |

|      |          |       |      |      |     |       |                            |       |                           |       |
|------|----------|-------|------|------|-----|-------|----------------------------|-------|---------------------------|-------|
| TLR5 | EU006635 | T5_4  | 1495 | 2036 | 542 | 5_4F  | GGCAGATTAGAG<br>GGGAAAGA   | 5_4R  | CCATCAAAGAAG<br>CAGGAAGA  | 58/56 |
| TLR5 | EU006635 | T5_5  | 1927 | 2613 | 687 | 5_5F  | TCACTCTCCCTTC<br>TTCTCCA   | 5_5R  | CAGACACTTG TTC<br>CAGTCCA | 60/58 |
| TLR5 | EU006635 | T5_6  | 2529 | 3231 | 703 | 5_6F  | CCTCCAAGGGAA<br>AACACTCT   | 5_6R  | ATTGGCTGTAAGT<br>GGGATGT  | 60/58 |
| TLR5 | EU006635 | T5_7  | 3153 | 3804 | 652 | 5_7F  | TTTTCTTCCAAGC<br>ATTCTTA   | 5_7R  | AGCCAGAGAGTT<br>TGGGTACA  | 60/58 |
| TLR5 | EU006635 | T5_8  | 3623 | 4195 | 573 | 5_8F  | GAAACCAGCTCC<br>TCTCTCT    | 5_8R  | ATCTTTCTGCTGC<br>TCCACAC  | 62/60 |
| TLR5 | EU006635 | T5_9  | 4059 | 4599 | 541 | 5_9F  | AGACTTTGAATG<br>GGTGCAGA   | 5_9R  | TGGTAACTGGCG<br>GAAATAAA  | 60/58 |
| TLR5 | EU006635 | T5_10 | 4536 | 5299 | 764 | 5_10F | GGAGCAGTTTCC<br>ACTTATCG   | 5_10R | ATTCTCATGCCGG<br>TTTCTTT  | 58/56 |
| TLR6 | AJ618974 | T6_1  | ND   | 969  | 800 | 6_1F  | ATTGAGAGTAAT<br>CAGCCAAT   | 6_1R  | GTAAGGTTGGTC<br>CTCCAGTG  | 60/58 |
| TLR6 | AJ618974 | T6_2  | 707  | 1506 | 845 | 6_2F  | ACTACCCATTGC<br>TCACTTGC   | 6_2R  | CTATACTCCCAAC<br>CCAAGAGC | 62/60 |
| TLR6 | AJ618974 | T6_3  | 1233 | 2077 | 845 | 6_3F  | GACACACGCTTT<br>ATACACATGC | 6_3R  | CACTGACACACC<br>ATCCTGAG  | 62/60 |
| TLR6 | AJ618974 | T6_4  | 1849 | ND   | 800 | 6_4F  | GCCAAGTATCCA<br>GTGACGTG   | 6_4R  | AATGGTGTTCTGT<br>GGAATGG  | 62/60 |
