# Supplementary material
Source: MDPI journal article supplement (https://www.mdpi.com/1424-2818/15/7/811)
Supplement: s1 [file s1]

**Supplementary table S2.** Haplotypes of *TLR2* directly determined by PacBio resequencing. Haplotypes in the proximal amplicon of *TLR2* were directly determined with PacBio resequencing in the Czech Red Pied cattle population and their frequencies are indicated; the haplotypes are ordered alphabetically.

| Haplotype No | Order of SNPs <sup>a</sup> | Number of differences from the reference sequence | Haplotype frequency in population (%) |
|--------------|----------------------------|---------------------------------------------------|---------------------------------------|
| 1            | C_A_G_G_T_G_A_G_C          | 1                                                 | 1.9                                   |
| 2            | C_T_A_A_C_A_C_T_T          | 9                                                 | 4.8                                   |
| 3            | C_T_A_A_T_A_C_T_T          | 8                                                 | 1.5                                   |
| 4            | C_T_G_A_C_A_C_T_T          | 8                                                 | 2.2                                   |
| 5            | C_T_G_G_C_A_C_T_T          | 7                                                 | 0.6                                   |
| 6            | T_A_A_G_T_G_A_G_C          | 1                                                 | 2.1                                   |
| 7            | T_A_G_A_C_A_C_T_T          | 6                                                 | 2.5                                   |
| 8            | T_A_G_G_G_G_A_G_C          | 1                                                 | 0.7                                   |
| 9            | T_A_G_G_T_A_A_G_C          | 1                                                 | 1.9                                   |
| 10           | T_A_G_G_T_G_A_G_C          | 0                                                 | 68.9                                  |
| 11           | T_A_G_G_T_G_A_G_T          | 1                                                 | 2.4                                   |
| 12           | T_A_G_G_T_G_A_T_C          | 1                                                 | 5.2                                   |
| 13           | T_A_G_G_T_G_G_G_C          | 1                                                 | 1.5                                   |
| 14           | T_T_A_A_C_A_C_T_T          | 8                                                 | 2.4                                   |
| 15           | T_T_G_G_T_G_A_G_C          | 1                                                 | 1.2                                   |

<sup>a</sup> Haplotypes consist of ordered SNPs 115T>C, 222A>T, 412G>A, 423G>A, 459T>C, 528G>A, 538A>C, 624C>T, and 657C>T. The individual SNPs are separated by underscores.
